# Supplementary material for: Influence of soot aerosol properties on the counting efficiency of instruments used for the periodic technical inspection of diesel vehicles
Source: Copernicus journal article supplement (doi:10.5194/ar-2-261-2024), 2024-08-07
Supplement: Supplementary file 1 [file ar-2-261-2024-supplement.pdf]

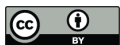

*Supplement of*

## **Influence of soot aerosol properties on the counting efficiency of instruments used for the periodic technical inspection of diesel vehicles**

**Tobias Hammer et al.**

*Correspondence to:* Konstantina Vasilatou ([konstantina.vasilatou@metas.ch](mailto:konstantina.vasilatou@metas.ch))

The copyright of individual parts of the supplement might differ from the article licence.

9 **Table S1:** Setpoints of soot particle generators miniCAST 6204 C, miniCAST 5201 BC, Mini Inverted Soot Generator (MSIG), and bigCAST used  
 10 in this study.

| Soot generator | Setpoint    | Propane (ml/min) | Mix. air (l/min) | Ox.air (ml/min) | Mix.N <sub>2</sub> (ml/min) | Dil. air (l/min) | Quench N <sub>2</sub> (l/min) | DME (ml/min) | Total number concentration (cm <sup>-3</sup> ) | C/O ratio | EC/TC mass-fraction (%) | GMD <sub>mob</sub> (nm) | GSD         |
|----------------|-------------|------------------|------------------|-----------------|-----------------------------|------------------|-------------------------------|--------------|------------------------------------------------|-----------|-------------------------|-------------------------|-------------|
| MSIG           | 100 nm      | 112              | -                | -               | -                           | 6.5              | -                             | 64           | 6.33E+04 ± 2.73E+03                            | 0.05      | 62.4                    | 97.3 ± 0.7              | 1.74 ± 0.02 |
| miniCAST6204C  | 50 nm       | 25               | 430              | -               | 10                          | 5                | 2                             | -            | 1.30E+05 ± 1.88E+04                            | 0.42      | 57.2                    | 51.0 ± 0.2              | 1.42 ± 0.01 |
|                | 70 nm       | 25               | 510              | -               | 10                          | 5                | 2                             | -            | 1.63E+05 ± 2.11E+04                            | 0.27      | 27.9                    | 74.8 ± 1.9              | 1.54 ± 0.08 |
|                | 80 nm       | 25               | 510              | -               | 10                          | 5                | 2                             | -            | 1.21E+05 ± 6.43E+03                            | 0.34      | 77.8                    | 85.0 ± 1.2              | 1.53 ± 0.01 |
|                | 100 nm      | 25               | 560              | -               | 10                          | 5                | 2                             | -            | 1.29E+05 ± 6.08E+03                            | 0.32      | 41.9                    | 97.8 ± 3.3              | 1.59 ± 0.01 |
| miniCAST5201BC | 50 nm       | 60               | 407              | 1100            | 0                           | 10               | 7                             | -            | 1.17E+05 ± 4.84E+03                            | 0.29      | 100                     | 56.1 ± 1.0              | 1.60 ± 0.02 |
|                | 70 nm lean  | 60               | 375              | 1100            | 0                           | 10               | 7                             | -            | 1.22E+05 ± 2.65E+03                            | 0.29      | 94.6                    | 80.3 ± 0.3              | 1.59 ± 0.01 |
|                | 70 nm rich  | 70               | 0                | 1130            | 0                           | 10               | 7                             | -            | 1.34E+05 ± 2.65E+03                            | 0.46      | 73.7                    | 79.2 ± 0.5              | 1.69 ± 0.00 |
|                | 80 nm       | 60               | 355              | 1100            | 0                           | 10               | 7                             | -            | 1.19E+05 ± 3.63E+03                            | 0.29      | 98.1                    | 86.8 ± 0.8              | 1.57 ± 0.01 |
|                | 100 nm lean | 60               | 73               | 1500            | 0                           | 10               | 7                             | -            | 1.63E+05 ± 1.63E+03                            | 0.27      | 97.4                    | 99.8 ± 1.3              | 1.63 ± 0.01 |
|                | 100 nm rich | 61               | 200              | 1100            | 0                           | 10               | 7                             | -            | 1.16E+05 ± 2.17E+03                            | 0.33      | 65.7                    | 101.9 ± 1.0             | 1.58 ± 0.00 |
| BigCAST        | 50 nm       | 60               | 1.55             | -               | 355                         | 10               | 11                            | -            | 1.69E+05 ± 2.69E+03                            | 0.28      | 50.9                    | 52.5 ± 0.3              | 1.57 ± 0.01 |

|                 |        |                     |      |   |     |    |    |   |                         |      |       |                |                 |
|-----------------|--------|---------------------|------|---|-----|----|----|---|-------------------------|------|-------|----------------|-----------------|
|                 | 70 nm  | 58                  | 1.60 | - | 309 | 10 | 15 | - | $1.17+0E5 \pm 1.03+0E3$ | 0.26 | 62.2  | $71.6 \pm 0.9$ | $1.54 \pm 0.00$ |
|                 | 80 nm  | 58                  | 1.6  | - | 230 | 10 | 13 | - | $1.53+0E5 \pm 6.57+0E3$ | 0.26 | 81.2  | $81.5 \pm 0.8$ | $1.53 \pm 0.01$ |
|                 | 100 nm | 58                  | 1.6  | - | 295 | 10 | 15 | - | $1.27+0E5 \pm 3.07+0E3$ | 0.26 | 100.0 | $98.9 \pm 0.2$ | $1.60 \pm 0.00$ |
| Vehicle Euro 5b | 56 nm  | Diesel fuel and air |      |   |     |    |    |   | $1.04E+05 \pm 2.37E+03$ | -    | 83.5  | $56.4 \pm 0.7$ | $2.12 \pm 0.00$ |

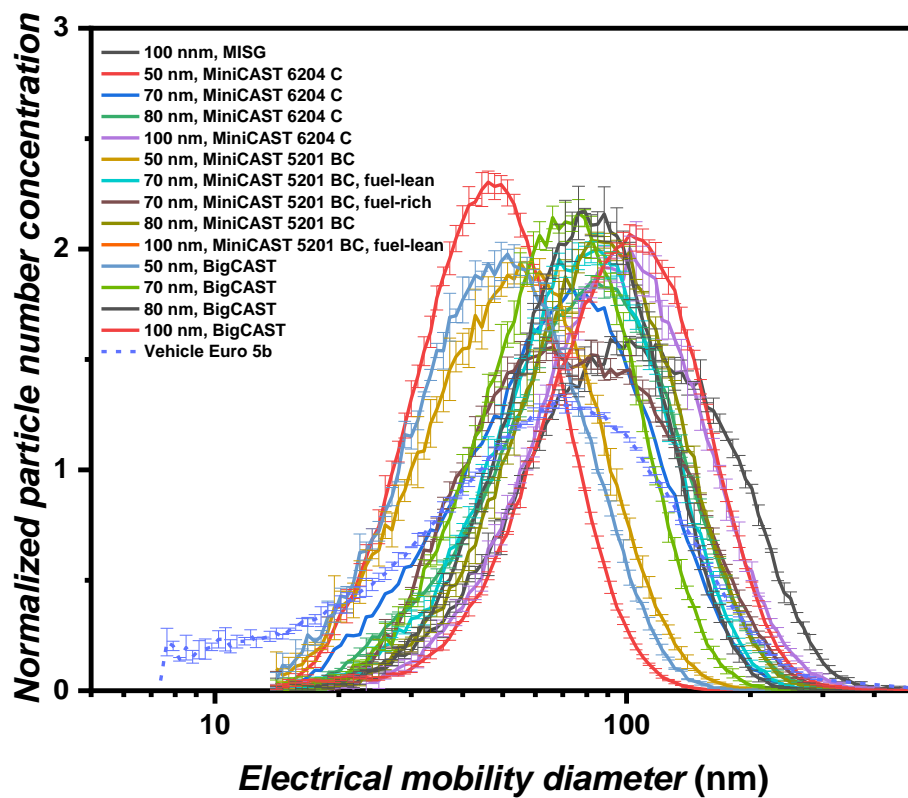

12

13 **Figure S1:** Normalised particle number size distributions of soot aerosols produced by the  
 14 miniCAST 6204 C, miniCAST 5201 BC, Mini Inverted Soot Generator (MISG), bigCAST  
 15 and a Euro 5b diesel vehicle.

16

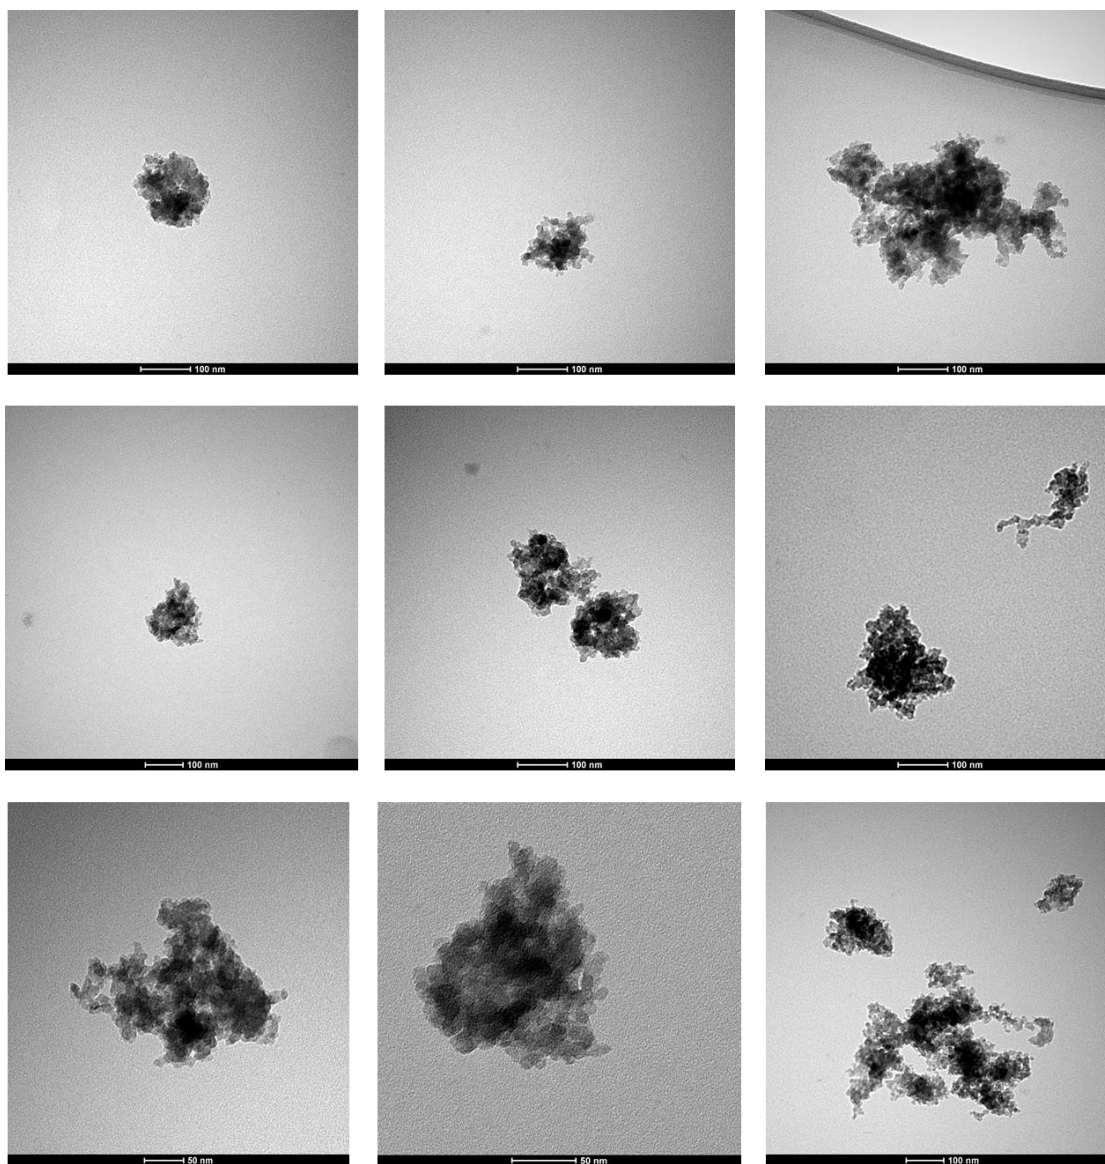

17  
18 **Figure S2:** TEM images of polydisperse soot aerosol with a  $GMD_{\text{mob}}$  of 102 nm generated by  
19 the mini-inverted soot generator (MISG).

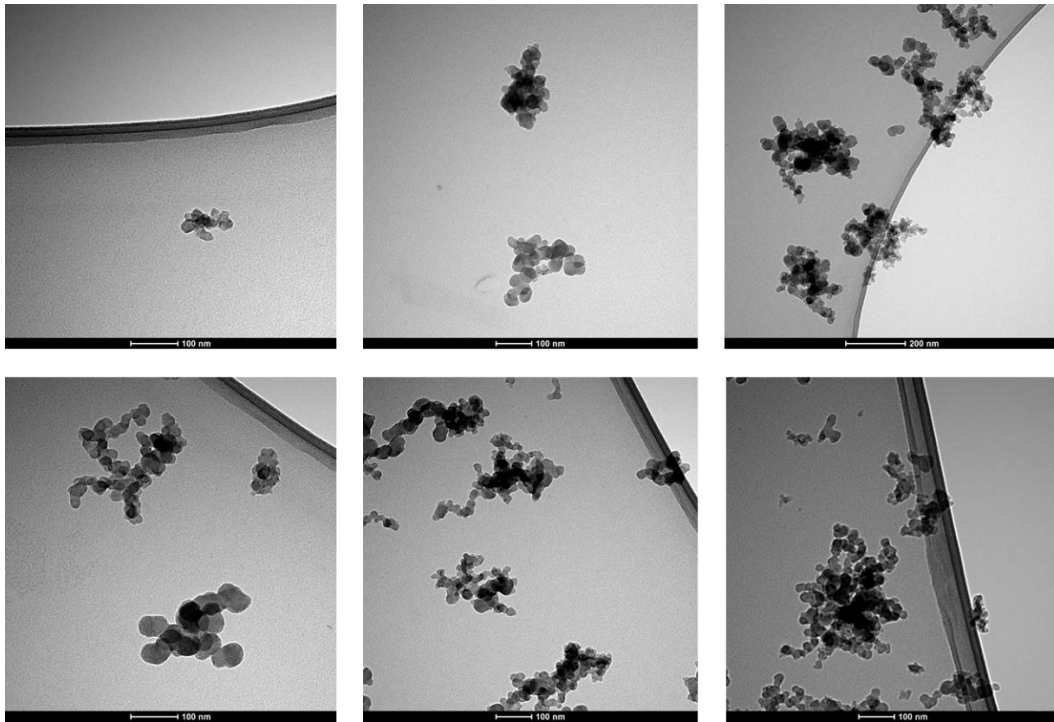

20

21 **Figure S3:** TEM images of polydisperse soot aerosol with a  $GMD_{mob}$  of 56 nm generated by  
 22 the Euro 5 b test vehicle.

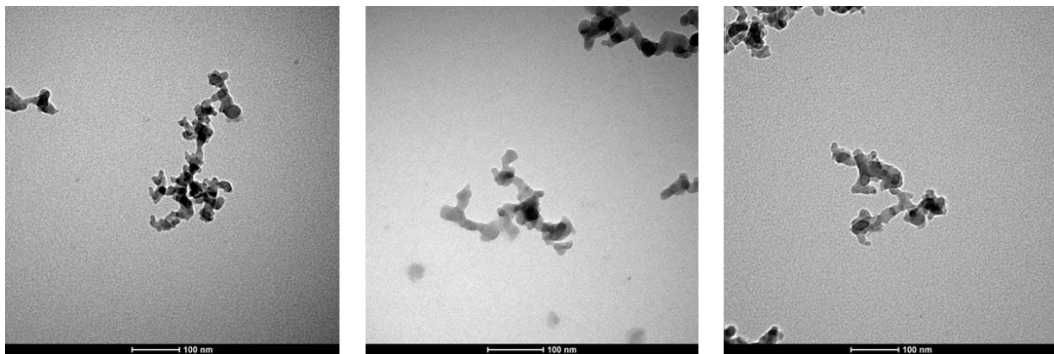

23

24 **Figure S4:** TEM images of polydisperse soot aerosol with a  $GMD_{mob}$  of 100 nm generated us-  
 25 ing a miniCAST 6204 C generator.

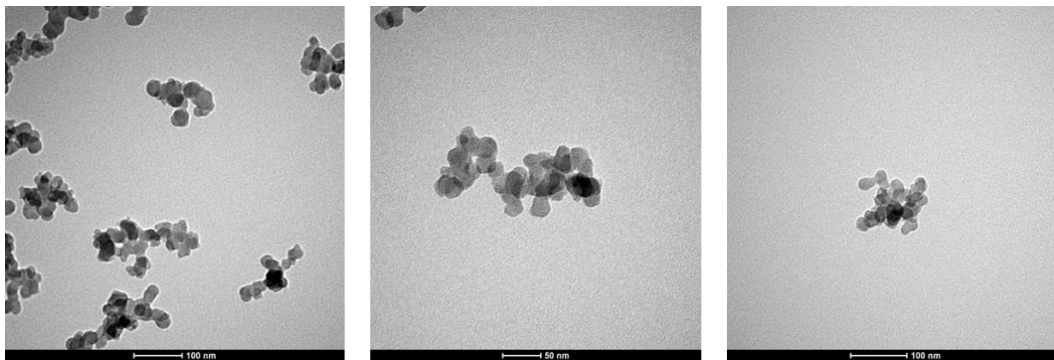

26

27 **Figure S5:** TEM images of polydisperse soot aerosol with a  $GMD_{mob}$  of 100 nm generated us-  
 28 ing a BigCAST generator.

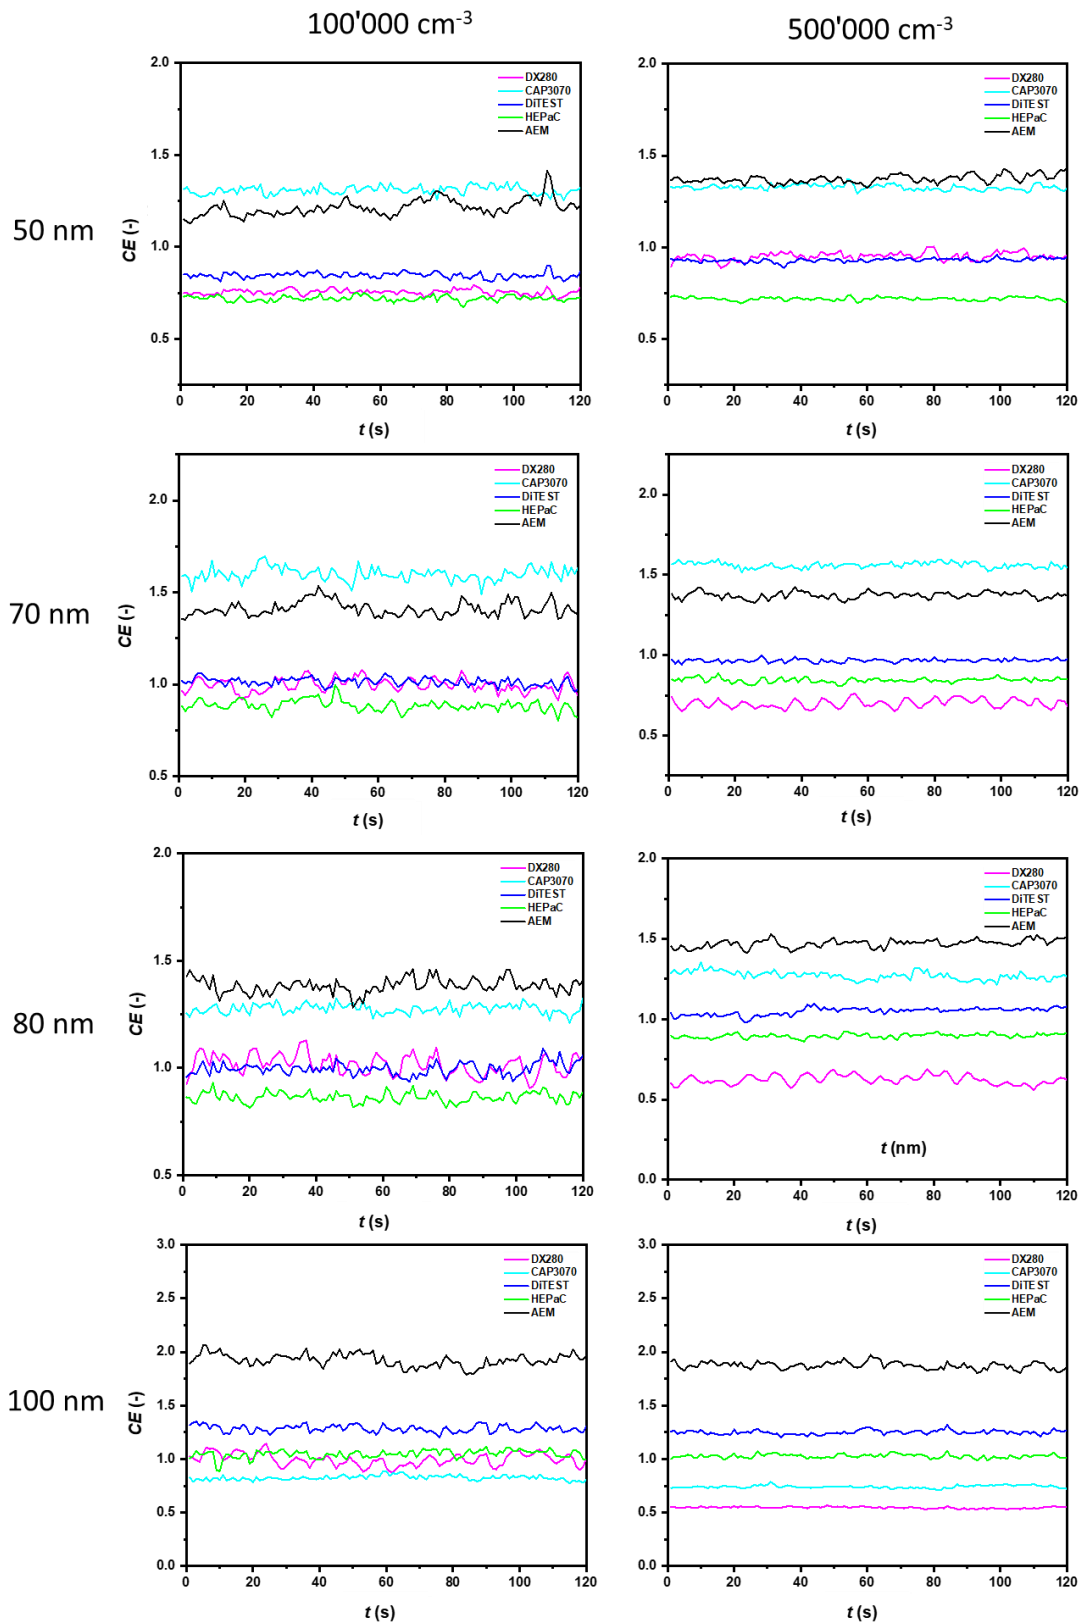

29

30 **Figure S6:** Counting efficiency (CE)-profile of six different PN-PTI counters: AEM, HEPaC,  
 31 DiTEST, CAP3070, DX280, Knestel; for a duration of 2 min. Soot generator: bigCAST.

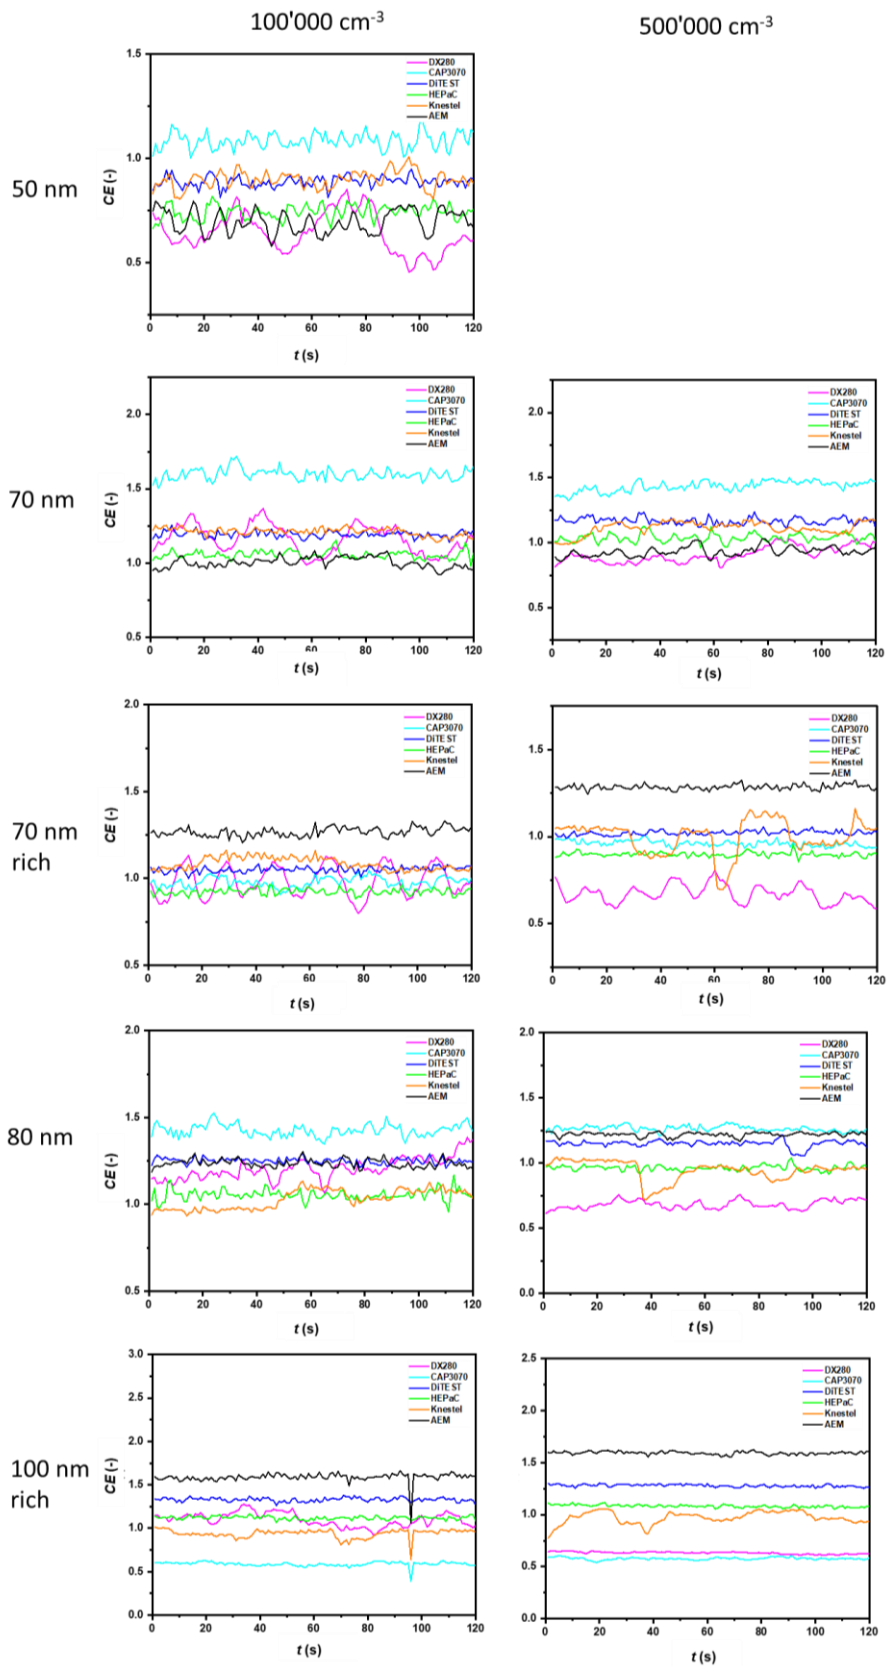

33

34 **Figure S7:** Counting efficiency (CE)-profile of six different PN-PTI counters: AEM, HEPaC,  
 35 DiTEST, CAP3070, DX280, Knestel; for a duration of 2 min. Soot generator: miniCAST  
 36 5201 BC.



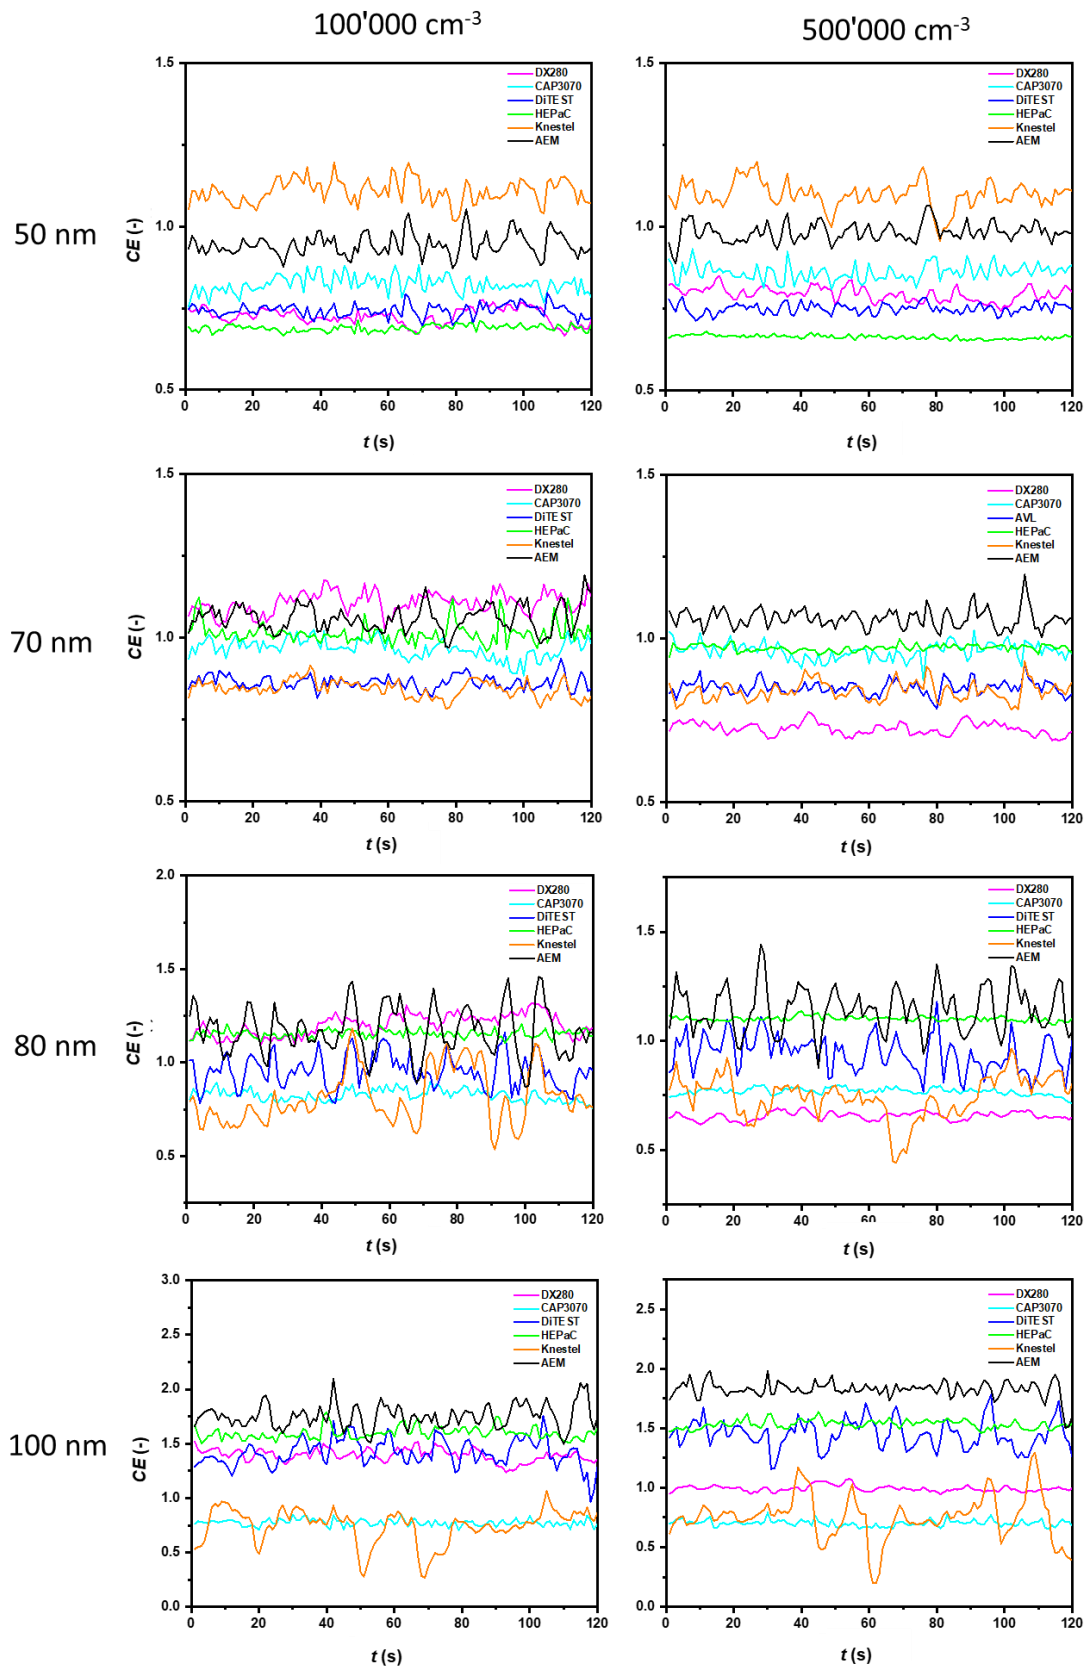

37

38 **Figure S8:** Counting efficiency (CE)-profile of six different PN-PTI counters: AEM, HEPaC,  
 39 DiTEST, CAP3070, DX280, Knestel; for a duration of 2 min. Soot generator: miniCAST  
 40 6204 C.

41

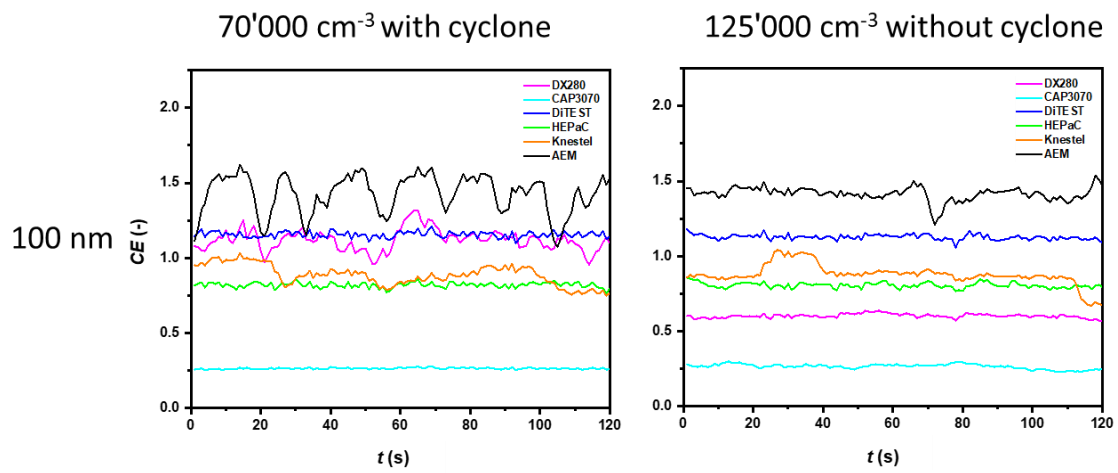

42

43 **Figure S9:** Counting efficiency (CE)-profile of six different PN-PTI counters: AEM, HEPaC,  
44 DiTEST, CAP3070, DX280, Knestel; for a duration of 2 min. Soot generator: mini-inverted  
45 soot generator (MISG).
